# Supplementary material
Source: HighWire-hosted journal article supplement (https://ard.bmj.com/content/77/1/98)
Supplement: inline-supplementary-material-8 [file inline-supplementary-material-8.docx]

Supplementary Table S8: Cardio-vascular disease (CVD) compared between HCQ ever users (group 1) and never users HCQ (group 2)

| **Study** | **Group** | **N** | **Total Person - years** | **CVD incident cases** | **Non-HCQ csDMARDS** | **TNFi** | **CS** | **HR or OR (95% CI)** |
| --- | --- | --- | --- | --- | --- | --- | --- | --- |
| **Sharma** 2016* (40) | Group 1 | 547 | 2881 | 3 | 62 | 41 | 86 | 0.60 (0.41; 0.94) |
| Group 2 | 719 | 3975 | 99 | 74 | 37 | 83 |
| **Van Halm** 2006$ (39) | Group 1 | 36 | NR | NR | NR | NR | NR | 0.45 (0.10; 2.04) |
| Group 2 | 37 | NR | NR | NR | NR | NR |
| **Shapiro** 2014# (38) | Group 1 | 241 | NR | 32 | NR | NR | NR | 0.27 (0.16; 0.46) |
| Group 2 | 273 | NR | 104 | NR | NR | NR |
| Definitions of CVD: *Myocardial infarction, unstable angina, cardiac revascularization, sudden death due to cardiac etiology, stroke, transient ischemic accident, and peripheral arterial disease with arterial revascularization procedure; $Verified medical history of coronary, cerebral or peripheral arterial disease; # Arterial and venous events including: myocardial infarction, stroke, transient ischemic accident, mesenteric event, pulmonary embolism and peripheral venous thrombosis  MTX = methotrexate; csDMARDS = conventional synthetic disease-modifying antirheumatic drugs; TNFi = TNF inhibitors; CS = corticosteroids | | | | | | | | |
