# Supplementary material
Source: HighWire-hosted journal article supplement (https://ard.bmj.com/content/77/1/98)

Supplementary Figure S2: Funnel plots for studies evaluating change in lipid profile after initiation of HCQ (total cholesterol (A), low-density lipoprotein (B), high-density lipoprotein (C) and triglycerides (D))


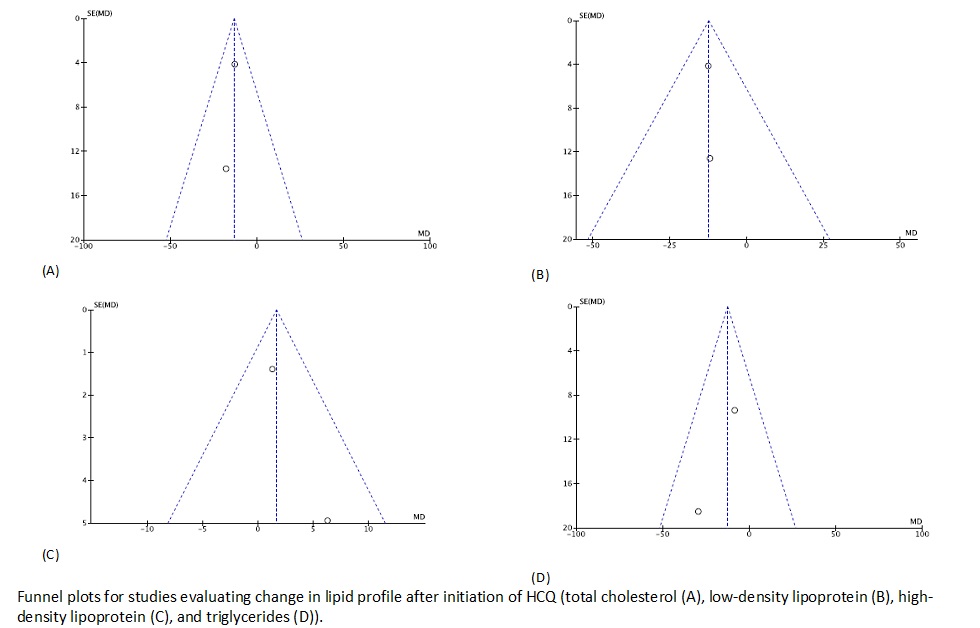

Supplement: inline-supplementary-material-10 [file inline-supplementary-material-10.docx]
