# Supplementary material
Source: HighWire-hosted journal article supplement (https://ard.bmj.com/content/77/1/98)

Supplementary Figure S3: Funnel plot for studies evaluating diabetes incidence by HCQ exposure


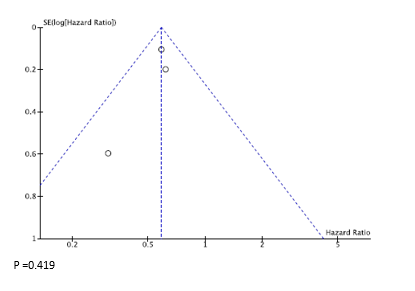

Supplement: inline-supplementary-material-11 [file inline-supplementary-material-11.docx]
